# Supplementary material for: Repigmentation by combined narrow-band ultraviolet B/adipose-derived stem cell transplantation in the mouse model: Role of Nrf2/HO-1-mediated Ca2+ homeostasis
Source: PubMed Central journal article supplement — Mol Med Rep. 2021 Nov 5;25(1):6. doi: 10.3892/mmr.2021.12522 (PMC8600419; doi:10.3892/mmr.2021.12522), 2021-11-05

Figure S1. The experimental procedure. ADSCs, adipose-derived stem cells; NUA, mice treated with narrow band ultraviolet B and adipose-derived stem cells together; NUAM, vitiligo model treated with NB-UVB/ADSCs and Nrf2 inhibitor ML385; Con, mice were treated with Vaseline only; NB-UVB, narrow band ultraviolet B.

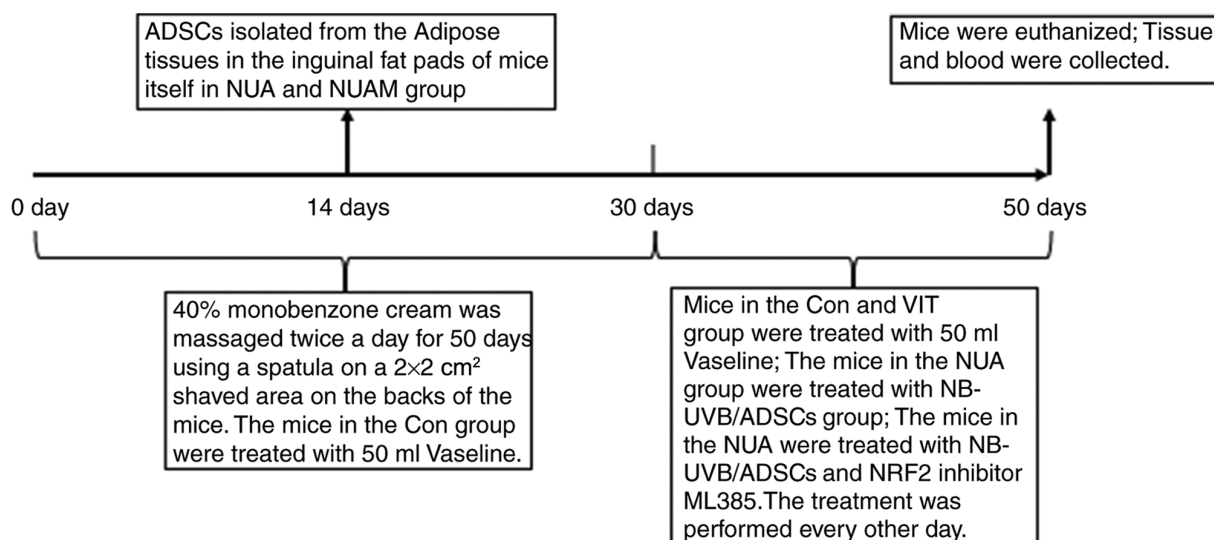

Supplement: Supplementary_Data.pdf [file Supplementary_Data.pdf]
